# Supplementary material for: Capturing the Interrelationship between Objectively Measured Physical Activity and Sedentary Behaviour in Children in the Context of Diverse Environmental Exposures
Source: MDPI journal article supplement (doi:10.3390/ijerph120910995), 2015-09-07
Supplement: s1 [file s1]

# Capturing the Interrelationship between Objectively Measured Physical Activity and Sedentary Behaviour in Children in the Context of Diverse Environmental Exposures

**Table S1.** Analyses to determine daily SB cut-point for multilevel logistic regression.

**Table S1a.** Sensitivity analysis testing daily SB cut-points protective of overweight and/or obese status.

| SB Cut-Points                    | OR    | CI          |
|----------------------------------|-------|-------------|
| SB minutes/day (<360 vs. ≥360)   | 0.000 | 0.000–0.000 |
| SB minutes/day (<420 vs. ≥420)   | 0.213 | 0.270–1.667 |
| SB minutes/day (<480 vs. ≥480) * | 0.428 | 0.188–0.975 |
| SB minutes/day (<540 vs. ≥540) * | 0.515 | 0.301–0.882 |
| SB minutes/day (<600 vs. ≥600)   | 0.542 | 0.292–1.006 |
| SB minutes/day (<660 vs. ≥660)   | 0.503 | 0.117–2.157 |

**Table S1b.** Multivariable logistic regression depicting the selected SB cut-point's association with overweight and/or obese status.

| Variables                                               | OR    | CI          |
|---------------------------------------------------------|-------|-------------|
| SB minutes/day (<480 vs. ≥480) *                        | 0.424 | 0.182–0.989 |
| Boys vs. Girls                                          | 1.092 | 0.658–1.815 |
| Age 11 vs. Age 10                                       | 0.877 | 0.430–1.789 |
| Age 12 vs. Age 10                                       | 1.217 | 0.576–2.570 |
| Age 13 vs. Age 10                                       | 1.571 | 0.691–3.571 |
| Age 14 vs. Age 10                                       | 0.711 | 0.246–2.050 |
| Mother's Education (University degree vs. all other) ** | 0.521 | 0.311–0.870 |

SB: sedentary behaviour; OR: odds ratio; CI: confidence interval; \*  $p < 0.05$ ; \*\*  $p < 0.01$ ; wear-time was controlled for in both sensitivity analyses and the multivariable logistic regression analysis.
